# Supplementary material
Source: publisher figshare collection journal article supplement (https://gsapubs.figshare.com/articles/dataset/_/19783126)
Supplement: Supplementary file 1 [file 1]

## Sheet: Sheet1
Sample	Locality	Zone	Age (Ma)	143Nd/144Nd (measured)	SE	143Nd/144Nd (age corrected)	ɛNd	±
TN-HG a	Tornimparte	Latium-Abruzzi Plat.	11	0.512257	6e-06	0.512252	-7.575	0.1
TN-HG b	Tornimparte	Latium-Abruzzi Plat.	11	0.512243	7e-06	0.512238	-7.8481	0.1
S-HG b	Salento	Salento (Apula Plat.)	12	0.512254	1.1e-05	0.512248	-7.64297	0.2
S-HG c	Salento	Salento (Apula Plat.)	12	0.51226	1.1e-05	0.512254	-7.52593	0.2
M- HG a	Majella	Majella (Apula Plat.)	16	0.512241	7e-06	0.512233	-7.93433	0.1
M- HG b	Majella	Majella (Apula Plat.)	16	0.51226	6e-06	0.512252	-7.5637	0.1
M-HG c	Majella	Majella (Apula Plat.)	16	0.512256	7e-06	0.512248	-7.64173	0.1
Measured La Jolla Std				0.511841	8e-06
Equivalent La Jolla value				0,511847*
*Wasserburg et al., 1981

## Sheet: G50118
Cornacchia, I., et al., 2022, Neodymium isotopes of central Mediterranean phosphatic hardgrounds reveal Miocene paleoceanography: Geology, v. 50, https://doi.org/10.1130/G50118.1
